# Supplementary material for: Repurposing Approved Drugs as Fluoroquinolone Potentiators to Overcome Efflux Pump Resistance in Staphylococcus aureus
Source: PubMed Central journal article supplement (PMC8672906; doi:10.1128/spectrum.00951-21), 2021-12-15
Supplement: spectrum00951-21_supp_1_seq6.pdf [file spectrum00951-21_supp_1_seq6.pdf]

## SUPPLEMENTARY INFORMATION

### Repurposing Approved Drugs as Fluoroquinolone Potentiators to Overcome Efflux Pump Resistance in *Staphylococcus aureus*

Nisha Mahey<sup>1, 2</sup>, Rushikesh Tambat<sup>1</sup>, Nishtha Chandal<sup>1, 2</sup>, Dipesh Kumar Verma<sup>3</sup>, Krishan Gopal Thakur<sup>3</sup>, Hemraj Nandanwar<sup>1, 2,\*</sup>

<sup>1</sup>Clinical Microbiology & Antimicrobial Research Laboratory, CSIR-Institute of Microbial Technology, Sector 39-A, Chandigarh-160036, India

<sup>2</sup>Academy of Scientific & Innovative Research (AcSIR), Ghaziabad, Uttar Pradesh-201002, India

<sup>3</sup>Structural Biology Laboratory, CSIR-Institute of Microbial Technology, Sector 39-A, Chandigarh-160036, India

#### \* ADDRESS FOR CORRESPONDENCE

Dr. Hemraj Nandanwar, Senior Principal Scientist, CSIR-Institute of Microbial Technology, Sector 39-A, Chandigarh-160036, India

E-mail ID: [hemraj@imtech.res.in](mailto:hemraj@imtech.res.in)

Telephone: +91-172-6665338 Fax: +91-172-2690585/2690632

#### RUNNING TITLE

Repurposing drugs for resistant *S. aureus*

## SUPPLEMENTARY INFORMATION (LEGENDS)

**Table S1** Binding energy (kcal/mol) of the lead compounds to the homology model of NorA efflux pump.

**Table S2** MIC of ciprofloxacin, norfloxacin in combination with compounds for *S. aureus* SA1199 (Wild-type strain).

**Table S3** MIC of tetracycline and moxifloxacin for *S. aureus* XU212 and *S. aureus* SA-1199B respectively in combination with different drugs.

**Table S4** MIC of moxifloxacin for *S. aureus* clinical strains (MRSA) in combination with different drugs.

**Fig. S1** Growth kinetics of *Staphylococcus aureus* SA-1199B in CA-MHB under sub-inhibitory concentrations ( $1/4 \times \text{MICs}$ ) of the drugs. OD600 nm values are the means of three independent experiments. The control (untreated) set was included to monitor normal bacterial growth.

**Fig. S2** Effect of sub-inhibitory concentrations ( $1/4 \times \text{MICs}$ ) of raloxifene, ezetimibe, propafenone, nefazodone, chlorprothixene, pyrvinium on the efflux inhibition of EtBr against *S. aureus* SA-1199B (*norA* over-expressed) in the presence and absence of 0.4% glucose; the positive control reserpine was included for comparison. The results presented correspond to the average of three independent assays  $\pm$  SD.

**Fig. S3** Effect of sub-inhibitory concentrations ( $1/4 \times \text{MICs}$ ) of raloxifene, ezetimibe, propafenone, nefazodone, chlorprothixene, pyrvinium on the efflux inhibition of EtBr against *S. aureus* K1758 (*norA* deletion) in the presence and absence of 0.4% glucose. The results presented correspond to the average of three independent assays  $\pm$  SD.

**Table S1** Binding energy (kcal/mol) of the lead compounds to the homology model of NorA efflux pump.

| Compounds                                                                                              | Docking Score (kcal/mol) | Residues Implicated in the Interaction                                                                                                                                                    | MMGBSA Score (kcal/mol) |
|--------------------------------------------------------------------------------------------------------|--------------------------|-------------------------------------------------------------------------------------------------------------------------------------------------------------------------------------------|-------------------------|
| 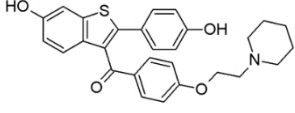<br>Raloxifene        | -9.064                   | Hydrophobic: Ile19, Phe303, Leu218, Tyr225,<br>Hydrogen bonding : Asn340, Phe16<br>Pi-Pi stacking: Phe140<br>Polar: Gln51, Ser337, Thr336<br>Charged (Negative): Glu222                   | -70.08                  |
| <br>Ezetimibe         | -7.807                   | Hydrogen bonding: Gly106, Gln51, Thr336, Asn340<br>Hydrophobic: Val108, Phe16, Ile19, Phe140, Ala215<br>Polar: Gln51, Ser337, Thr336<br>Charged (Positive): Arg310                        | -51.65                  |
| <br>Propafenone      | -7.848                   | Hydrophobic: Ile19, Val108, Leu218, Phe16, Met109, Ala215<br>Hydrogen bonding : Asn340, Thr336<br>Polar: Gln51, Ser337, Thr336<br>Charged (Positive): Arg310                              | -48.41                  |
| <br>Nefazodone      | -7.756                   | Hydrophobic: Ile19, Phe303, Leu218, Phe140,<br>Hydrogen bonding : Asn340<br>Polar: Gln51, Ser337, Thr336<br>Charged (Positive): Arg310                                                    | -60.78                  |
| <br>Chlorprothixene | -3.757                   | Hydrophobic: Val44, Ile19, Phe47, Ala105, Met109<br>Polar: Asn340, Ser337, Thr336, Gln51<br>Charged (Positive): Arg310                                                                    | -50.18                  |
| <br>Pyrvinium       | -4.217                   | Hydrophobic: Ile136, Phe16, Leu218, Met132, Tyr225, Met109<br>Pi-Pi stacking: Phe140<br>Polar: Asn340, Ser337, Thr336<br>Charged (Positive): Arg310, Lys238<br>Charged (Negative): Glu222 | -45.35                  |

**Table S2** The MIC of ciprofloxacin, norfloxacin in combination with compounds for *S. aureus* SA1199 (Wild-type strain).

|                 | Intrinsic MIC<br>( $\mu\text{M}$ ) | Concentration used<br>( $\mu\text{M}$ ) | MIC in the presence of compounds |             |
|-----------------|------------------------------------|-----------------------------------------|----------------------------------|-------------|
|                 |                                    |                                         | Ciprofloxacin                    | Norfloxacin |
|                 |                                    |                                         | 0.5                              | 1           |
| Raloxifene      | >200                               | 50                                      | 0.125                            | 0.25        |
|                 |                                    | 25                                      | 0.25                             | 0.5         |
|                 |                                    | 12.5                                    | 0.5                              | 1           |
| Ezetimibe       | >200                               | 50                                      | 0.25                             | 0.25        |
|                 |                                    | 25                                      | 0.25                             | 1           |
|                 |                                    | 12.5                                    | 0.5                              | 1           |
| Propafenone     | >200                               | 50                                      | 0.25                             | 0.5         |
|                 |                                    | 25                                      | 0.5                              | 0.5         |
|                 |                                    | 12.5                                    | 0.5                              | 1           |
| Nefazodone      | >200                               | 50                                      | 0.25                             | 0.5         |
|                 |                                    | 25                                      | 0.5                              | 1           |
|                 |                                    | 12.5                                    | 0.5                              | 1           |
| Chlorprothixene | >200                               | 50                                      | 0.25                             | 0.5         |
|                 |                                    | 25                                      | 0.25                             | 0.5         |
|                 |                                    | 12.5                                    | 0.5                              | 1           |
| Pyrvinium       | 3.125                              | 0.78                                    | 0.125                            | 0.25        |
|                 |                                    | 0.39                                    | 0.25                             | 0.5         |
|                 |                                    | 0.195                                   | 0.5                              | 1           |
| Reserpine       | 210                                | 52                                      | 0.25                             | 0.5         |
|                 |                                    | 26                                      | 0.25                             | 0.5         |
|                 |                                    | 13                                      | 0.5                              | 1           |

**Table S3** MIC of tetracycline, and moxifloxacin for *S. aureus* XU212, and *S. aureus* SA-1199B respectively in combination with different drugs.

| Compounds       | <i>S. aureus</i> XU212   |                       |                                | <i>S. aureus</i> SA-1199B |                       |                                |
|-----------------|--------------------------|-----------------------|--------------------------------|---------------------------|-----------------------|--------------------------------|
|                 | Intrinsic MIC ( $\mu$ M) | Conc. used ( $\mu$ M) | MIC <sup>a</sup> ( $\mu$ g/mL) | Intrinsic MIC ( $\mu$ M)  | Conc. used ( $\mu$ M) | MIC <sup>b</sup> ( $\mu$ g/mL) |
|                 | -                        | -                     | 256                            | -                         | -                     | 0.25                           |
| Raloxifene      | 200                      | 50                    | 256                            | 200                       | 50                    | 0.25                           |
| Ezetimibe       | $\geq 100$               | 50                    | 256                            | 200                       | 50                    | 0.25                           |
| Propafenone     | $\geq 200$               | 50                    | 256                            | 800                       | 50                    | 0.25                           |
| Nefazodone      | $\geq 200$               | 50                    | 256                            | 200                       | 50                    | 0.25                           |
| Chlorprothixene | 100                      | 12.5                  | 256                            | 200                       | 50                    | 0.25                           |
| Pyrvinium       | 3.125                    | 0.78                  | 256                            | 1.56                      | 0.39                  | 0.25                           |

<sup>a</sup> MIC of tetracycline in the presence of compounds; <sup>b</sup> MIC of moxifloxacin in the presence of compounds.

**Table S4** MIC of moxifloxacin for *S. aureus* clinical strains (MRSA) in combination with different drugs.

| Compounds       | Concentration used ( $\mu$ M) | MIC of moxifloxacin in the presence of compounds |       |       |       |          |          |
|-----------------|-------------------------------|--------------------------------------------------|-------|-------|-------|----------|----------|
|                 |                               | MRSA 1                                           | MRSA2 | MRSA3 | MRSA4 | GMCH 831 | GMCH 839 |
| -               | -                             | 2                                                | 1     | 2     | 4     | 1        | 1        |
| Raloxifene      | 50                            | 2                                                | 1     | 2     | 4     | 1        | 1        |
| Ezetimibe       | 50                            | 2                                                | 1     | 2     | 4     | 1        | 1        |
| Propafenone     | 50                            | 2                                                | 1     | 2     | 4     | 1        | 1        |
| Nefazodone      | 50                            | 2                                                | 1     | 2     | 4     | 1        | 1        |
| Chlorprothixene | 50                            | 2                                                | 1     | 2     | 4     | 1        | 1        |
| Pyrvinium       | 0.195                         | 2                                                | 1     | 2     | 4     | 1        | 1        |

## Supplementary figures

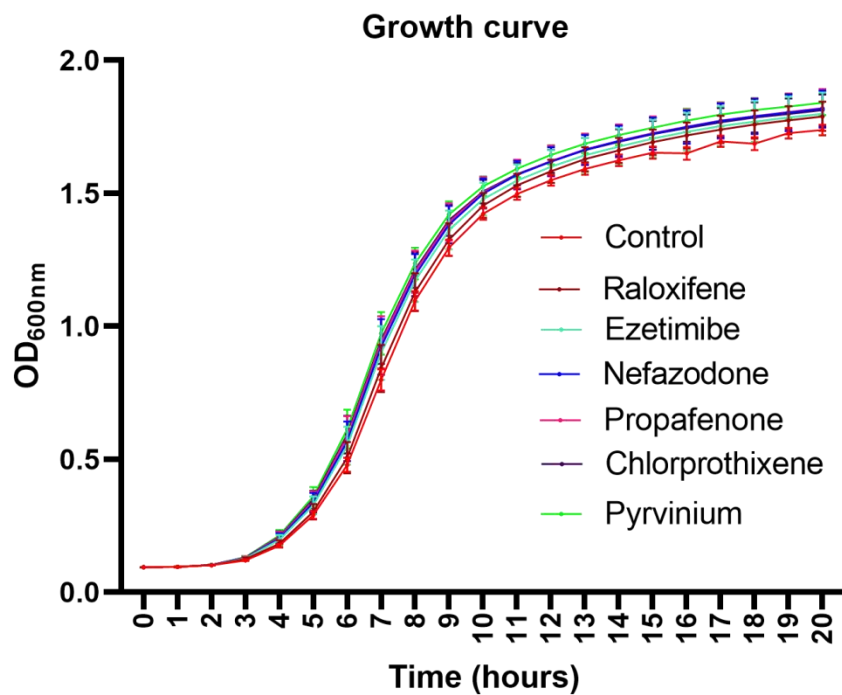

**Fig. S1** Growth kinetics of *Staphylococcus aureus* SA-1199B in CA-MHB under sub-inhibitory concentrations ( $1/4 \times \text{MICs}$ ) of the drugs. OD<sub>600nm</sub> values are the means of three independent experiments. The control (untreated) set was included to monitor normal bacterial growth.

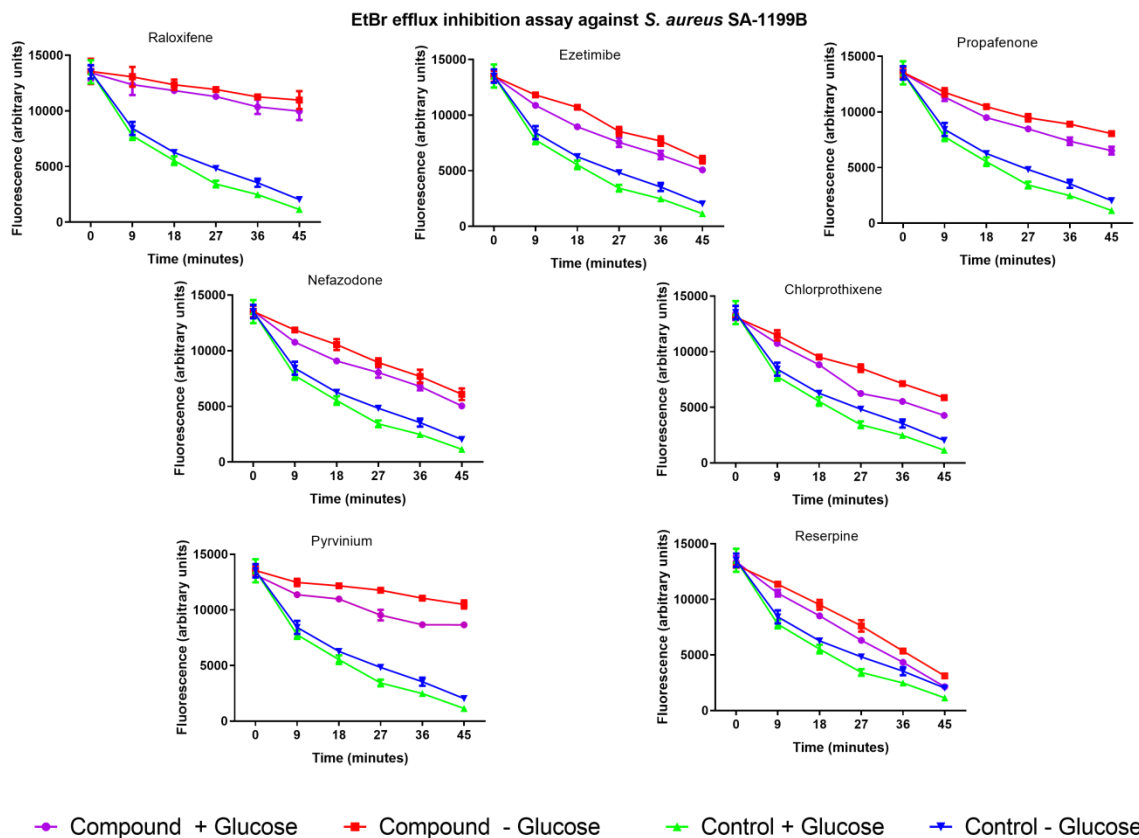

**Fig. S2** Effect of sub-inhibitory concentrations ( $1/4 \times \text{MICs}$ ) of raloxifene, ezetimibe, propafenone, nefazodone, chlorprothixene, pyrvinium on the efflux inhibition of EtBr against *S. aureus* SA-1199B (*norA* over-expressed) in the presence and absence of 0.4% glucose; the positive control reserpine was included for comparison. The results presented correspond to the average of three independent assays  $\pm$  SD.

EtBr efflux inhibition assay against *S. aureus* K1758

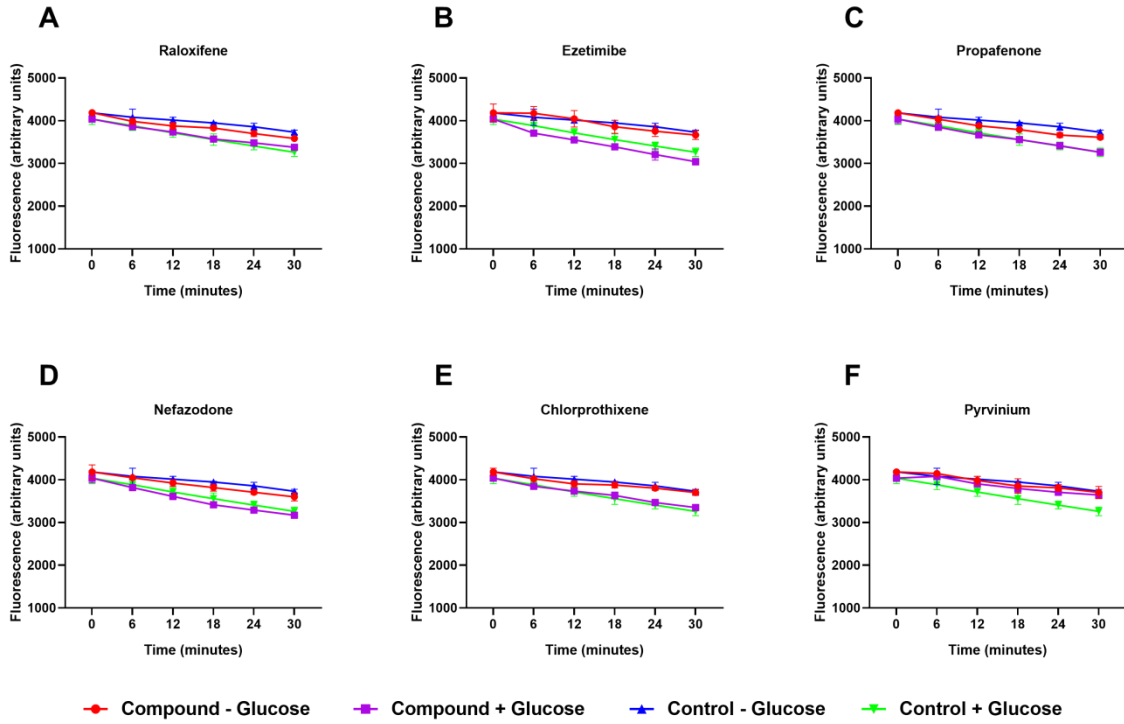

**Fig. S3** Effect of sub-inhibitory concentrations ( $1/4 \times \text{MICs}$ ) of raloxifene, ezetimibe, propafenone, nefazodone, chlorprothixene, pyrvinium on the efflux inhibition of EtBr against *S. aureus* K1758 (*norA* deletion) in the presence and absence of 0.4% glucose. The results presented correspond to the average of three independent assays  $\pm$  SD.
